# Supplementary material for: Biological signatures of the International Prognostic Index in diffuse large B-cell lymphoma
Source: PubMed Central journal article supplement — Blood Adv. 2024 Jan 5;8(7):1587–99. doi: 10.1182/bloodadvances.2023011425 (PMC10987882; doi:10.1182/bloodadvances.2023011425), 2024-01-05

# Supplementary Materials for

## **Biological signatures of International Prognostic Index in diffuse large B-cell lymphoma**

Yue Wang <sup>1\*</sup>, Qing Shi <sup>1\*</sup>, Zi-Yang Shi <sup>1\*</sup>, Mu-Chen Zhang <sup>1\*</sup>, Rong Shen <sup>1</sup>, Di Fu <sup>1</sup>, Lei Dong <sup>2</sup>, Hong-Mei Yi <sup>2</sup>, Bin-Shen Ouyang <sup>2</sup>, Rong-Ji Mu <sup>4</sup>, Shu Cheng <sup>1</sup>, Li Wang <sup>1,3</sup>, Peng-Peng Xu <sup>1†</sup>, Wei-Li Zhao <sup>1,3†</sup>

† Correspondence to: Wei-Li Zhao, Email: zhao.weili@yahoo.com. Peng-Peng Xu, Email: pengpeng\_xu@126.com.

### **This PDF file includes:**

Supplementary Tables (Table S1-S7)

Supplementary Figures (Figure S1-S5)

**Supplementary Table S1A.** Frequency of oncogenic mutations related to different IPI risk groups (n = 1233).

|                                                       | IPI 0-1 (%) | IPI 2 (%) | IPI 3 (%) | IPI 4-5 (%) | P       |
|-------------------------------------------------------|-------------|-----------|-----------|-------------|---------|
| <i>CARD11</i>                                         | 6.8         | 10.0      | 11.7      | 11.2        | 0.015   |
| <i>CD79A</i>                                          | 1.4         | 2.2       | 3.3       | 3.7         | 0.026   |
| <i>CD79B</i>                                          | 11.0        | 10.0      | 13.8      | 23.5        | <0.0001 |
| <i>CREBBP</i>                                         | 8.9         | 10.8      | 8.3       | 16.0        | 0.037   |
| <i>FAS</i>                                            | 6.3         | 6.9       | 6.3       | 11.8        | 0.049   |
| <i>FBWX7</i>                                          | 1.0         | 2.2       | 3.3       | 2.7         | 0.040   |
| <i>MYC</i>                                            | 6.1         | 8.2       | 7.9       | 10.7        | 0.044   |
| <i>MYD88</i>                                          | 17.9        | 19.0      | 19.2      | 30.5        | 0.002   |
| <i>PIM1</i>                                           | 23.3        | 20.8      | 22.9      | 33.2        | 0.036   |
| <i>PRDM1</i>                                          | 5.9         | 9.1       | 11.7      | 10.7        | 0.005   |
| <i>TBLIXR1</i>                                        | 7.1         | 7.8       | 5.8       | 13.9        | 0.042   |
| <i>SGK1</i>                                           | 10.6        | 3.9       | 5.8       | 6.4         | 0.014   |
| <i>MYD88<sup>L265P</sup></i>                          | 12.2        | 11.7      | 13.8      | 22.5        | 0.002   |
| <i>MYD88<sup>L265P</sup>/CD79B</i><br>double mutation | 3.8         | 3.0       | 5.4       | 10.7        | 0.001   |

**Supplementary Table S1B.** Frequency of oncogenic mutations related to risk factors within IPI (n = 1233).

|                                                       | Age > 60 (%)                    | Age ≤ 60 (%)                    | P        |
|-------------------------------------------------------|---------------------------------|---------------------------------|----------|
| <i>BTG1</i>                                           | 12.9                            | 9.2                             | 0.04     |
| <i>CD79B</i>                                          | 16.9                            | 10.0                            | < 0.0001 |
| <i>DTX1</i>                                           | 13.6                            | 10.0                            | 0.049    |
| <i>FAS</i>                                            | 8.9                             | 5.8                             | 0.033    |
| <i>MYD88</i>                                          | 25.0                            | 16.4                            | < 0.0001 |
| <i>TBL1XR1</i>                                        | 9.9                             | 6.5                             | 0.036    |
| <i>TET2</i>                                           | 16.2                            | 9.9                             | 0.001    |
| <i>MYD88<sup>L265P</sup></i>                          | 17.5                            | 10.9                            | 0.001    |
| <i>MYD88<sup>L265P</sup>/CD79B</i><br>double mutation | 7.2                             | 3.2                             | 0.001    |
|                                                       | Ann Arbor stage III-IV (%)      | Ann Arbor stage I-II (%)        |          |
| <i>CARD11</i>                                         | 10.9                            | 7.3                             | 0.028    |
| <i>CD58</i>                                           | 7.2                             | 4.3                             | 0.027    |
| <i>CREBBP</i>                                         | 12.7                            | 7.9                             | 0.005    |
| <i>FBXW7</i>                                          | 2.8                             | 1.1                             | 0.028    |
| <i>MYC</i>                                            | 9.2                             | 6.0                             | 0.034    |
| <i>PRDM1</i>                                          | 10.0                            | 6.8                             | 0.04     |
| <i>SGK1</i>                                           | 5.5                             | 9.9                             | 0.004    |
|                                                       | Extra-nodal involvement ≥ 2 (%) | Extra-nodal involvement 0-1 (%) |          |
| <i>CD79A</i>                                          | 3.6                             | 1.7                             | 0.046    |
| <i>CD79B</i>                                          | 17.6                            | 11.4                            | 0.003    |
| <i>FBXW7</i>                                          | 3.6                             | 1.3                             | 0.007    |
| <i>MYC</i>                                            | 10.2                            | 6.4                             | 0.023    |
| <i>MYD88</i>                                          | 23.7                            | 18.9                            | 0.010    |
| <i>MYD88<sup>L265P</sup></i>                          | 17.9                            | 12.3                            | 0.010    |
| <i>MYD88<sup>L265P</sup>/CD79B</i><br>double mutation | 7.4                             | 4.0                             | 0.012    |
|                                                       | LDH ratio > 1*ULN (%)           | LDH ratio normal (%)            |          |
| <i>BTG1</i>                                           | 13.5                            | 8.4                             | 0.004    |
| <i>CD79B</i>                                          | 16.3                            | 10.2                            | 0.001    |
| <i>MYC</i>                                            | 9.5                             | 5.6                             | 0.011    |
| <i>MYD88</i>                                          | 22.8                            | 17.7                            | 0.026    |
| <i>NOTCH2</i>                                         | 8.6                             | 5.0                             | 0.011    |
| <i>PRDM1</i>                                          | 10.0                            | 6.8                             | 0.044    |
| <i>TP53</i>                                           | 18.8                            | 11.8                            | 0.001    |
| <i>SGK1</i>                                           | 9.7                             | 5.9                             | 0.013    |

|                                    |                        |                        |       |
|------------------------------------|------------------------|------------------------|-------|
| <i>MYD88<sup>L265P</sup>/CD79B</i> | 6.5                    | 3.5                    | 0.017 |
| double mutation                    |                        |                        |       |
|                                    | <b>ECOG PS ≥ 2 (%)</b> | <b>ECOG PS 0-1 (%)</b> |       |
| <i>CD79B</i>                       | 18.8                   | 12.5                   | 0.039 |
| <i>HIST1H1C</i>                    | 11.6                   | 5.8                    | 0.010 |
| <i>TMSB4X</i>                      | 13.8                   | 8.2                    | 0.031 |

**Supplementary Figure S1.** (A) PFS of patients with available genetic subtypes (n = 963). (B) OS of patients with available genetic subtypes (n = 963). (C) Kaplan-Meier models of PFS according to genetic subtypes. (D) Kaplan-Meier models of OS according to genetic subtypes.

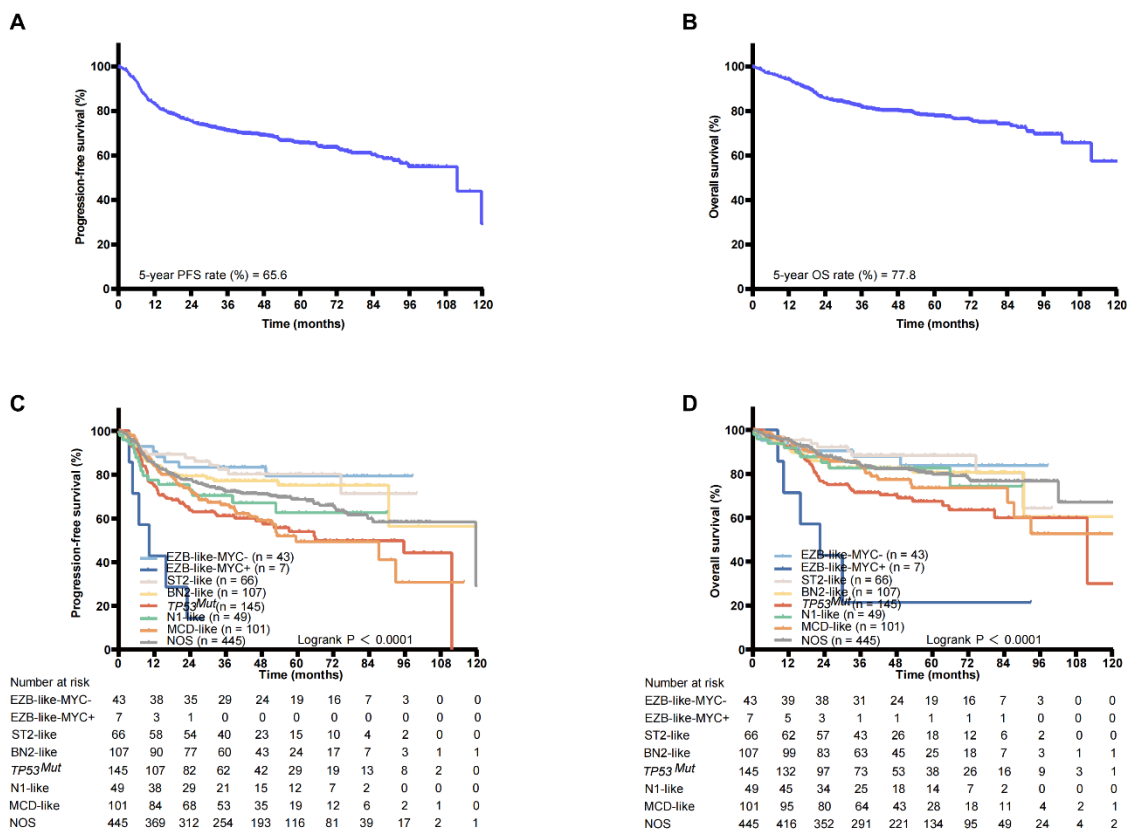

**Supplementary Table S2.** Stratified models for progression-free survival and overall survival of IPI risk groups and genetic subtypes in BCC cohort (n = 296).

| Risk factor                | PFS                 |         |                       |         | OS                  |         |                       |         |
|----------------------------|---------------------|---------|-----------------------|---------|---------------------|---------|-----------------------|---------|
|                            | Univariate analysis |         | Multivariate analysis |         | Univariate analysis |         | Multivariate analysis |         |
|                            | Hazard ratio        | P       | Hazard ratio          | P       | Hazard ratio        | P       | Hazard ratio          | P       |
|                            | (95%CI)             |         | (95%CI)               |         | (95%CI)             |         | (95%CI)               |         |
| <b>IPI risk groups</b>     |                     |         |                       |         |                     |         |                       |         |
| IPI 0-1                    | reference           |         | reference             |         | reference           |         | reference             |         |
| IPI 2                      | 1.770 (1.097-2.856) | 0.019   | 1.844 (1.134-3.000)   | 0.014   | 1.723 (1.018-2.915) | 0.043   | 1.800 (1.055-3.070)   | 0.031   |
| IPI 3                      | 3.063 (1.865-5.031) | <0.0001 | 2.800 (1.671-4.692)   | <0.0001 | 3.234 (1.897-5.514) | <0.0001 | 2.977 (1.707-5.192)   | <0.0001 |
| IPI 4-5                    | 4.590 (2.851-7.387) | <0.0001 | 4.561 (2.814-7.394)   | <0.0001 | 5.515 (3.331-9.131) | <0.0001 | 5.622 (3.372-9.373)   | <0.0001 |
| <b>Genetic subtypes</b>    |                     |         |                       |         |                     |         |                       |         |
| NOS                        | -                   | -       | reference             | -       | -                   | -       | reference             | -       |
| EZB-like-MYC-              | 0.498 (0.304-0.817) | 0.006   | 0.609 (0.328-1.130)   | 0.116   | 0.432 (0.248-0.754) | 0.003   | 0.557 (0.283-1.094)   | 0.089   |
| EZB-like-MYC+              | 0.909 (0.401-2.062) | 0.820   | 0.963 (0.389-2.380)   | 0.934   | 0.873 (0.357-2.138) | 0.767   | 0.962 (0.361-2.565)   | 0.938   |
| ST2-like                   | 0.686 (0.395-1.191) | 0.180   | 1.025 (0.528-1.992)   | 0.941   | 0.711 (0.400-1.261) | 0.243   | 1.112 (0.557-2.220)   | 0.764   |
| BN2-like                   | 1.138 (0.630-2.057) | 0.667   | 1.268 (0.632-2.544)   | 0.504   | 1.212 (0.653-2.250) | 0.542   | 1.418 (0.685-2.933)   | 0.347   |
| <i>TP53</i> <sup>Mut</sup> | 1.615 (1.135-2.299) | 0.008   | 1.641 (0.995-2.705)   | 0.052   | 1.668 (1.150-2.419) | 0.007   | 1.768 (1.047-2.986)   | 0.033   |
| N1-like                    | 1.752 (0.648-4.741) | 0.269   | 1.512 (0.511-4.478)   | 0.455   | 2.072 (0.764-5.618) | 0.152   | 1.832 (0.614-5.466)   | 0.278   |
| MCD-like                   | 1.909 (1.210-3.012) | 0.005   | 1.754 (0.976-3.153)   | 0.060   | 1.778 (1.103-2.864) | 0.018   | 1.689 (0.915-3.116)   | 0.094   |

**Supplementary Table S3.** Stratified models for progression-free survival and overall survival of individual IPI risk factors and genetic subtypes in Ruijin cohort (n = 963).

| Risk factor            | PFS                  |         |                       |         | OS                   |         |                       |         |
|------------------------|----------------------|---------|-----------------------|---------|----------------------|---------|-----------------------|---------|
|                        | Univariate analysis  |         | Multivariate analysis |         | Univariate analysis  |         | Multivariate analysis |         |
|                        | Hazard ratio         | P       | Hazard ratio          | P       | Hazard ratio         | P       | Hazard ratio          | P       |
|                        | (95%CI)              |         | (95%CI)               |         | (95%CI)              |         | (95%CI)               |         |
| Age >60                | 1.966 (1.573-2.457)  | <0.0001 | 1.632 (1.297-2.054)   | <0.0001 | 2.740 (2.058-3.648)  | <0.0001 | 2.457 (1.830-3.300)   | <0.0001 |
| Ann Arbor stage III-IV | 3.702 (2.926-4.685)  | <0.0001 | 2.324 (1.749-3.086)   | <0.0001 | 4.209 (3.097-5.720)  | <0.0001 | 2.450 (1.705-3.520)   | <0.0001 |
| Multiple ENI           | 2.323 (1.851-2.915)  | <0.0001 | 1.023 (0.787-1.330)   | 0.866   | 2.230 (1.680-2.961)  | <0.0001 | 0.967 (0.703-1.328)   | 0.835   |
| LDH ratio > 1*ULN      | 3.727 (2.944-4.718)  | <0.0001 | 2.266 (1.737-2.957)   | <0.0001 | 4.415 (3.244-6.010)  | <0.0001 | 2.603 (1.840-3.681)   | <0.0001 |
| ECOG > 1               | 3.157 (2.341-4.258)  | <0.0001 | 1.633 (1.197-2.229)   | 0.002   | 3.266 (2.290-4.658)  | <0.0001 | 1.700 (1.179-2.453)   | 0.005   |
| EZB-like-MYC-          | 0.478 (0.237-0.966)  | 0.04    | 0.537 (0.264-1.092)   | 0.086   | 0.592 (0.263-1.334)  | 0.206   | 0.730 (0.321-1.660)   | 0.452   |
| EZB-like-MYC+          | 5.353 (2.378-12.048) | <0.0001 | 6.643 (2.917-15.126)  | <0.0001 | 4.984 (2.047-12.136) | <0.0001 | 4.756 (1.921-11.776)  | 0.001   |
| ST2-like               | 0.562 (0.323-0.980)  | 0.042   | 0.709 (0.403-1.246)   | 0.232   | 0.626 (0.321-1.223)  | 0.17    | 0.761 (0.385-1.504)   | 0.432   |
| BN2-like               | 0.697 (0.467-1.042)  | 0.078   | -                     | -       | 0.908 (0.572-1.442)  | 0.683   | -                     | -       |
| TP53Mut                | 1.575 (1.195-2.076)  | 0.001   | 1.498 (1.119-2.007)   | 0.007   | 1.791 (1.288-2.490)  | 0.001   | 1.699 (1.196-2.414)   | 0.003   |
| N1-like                | 1.105 (0.668-1.827)  | 0.698   | -                     | -       | 0.979 (0.501-1.911)  | 0.95    | -                     | -       |
| MCD-like               | 1.435 (1.047-1.968)  | 0.025   | 1.130 (0.809-1.580)   | 0.474   | 1.145 (0.753-1.741)  | 0.528   | 0.841 (0.540-1.311)   | 0.444   |

**Supplementary Figure S2.** Survival analysis of IPI risk groups under different genetic subtypes.

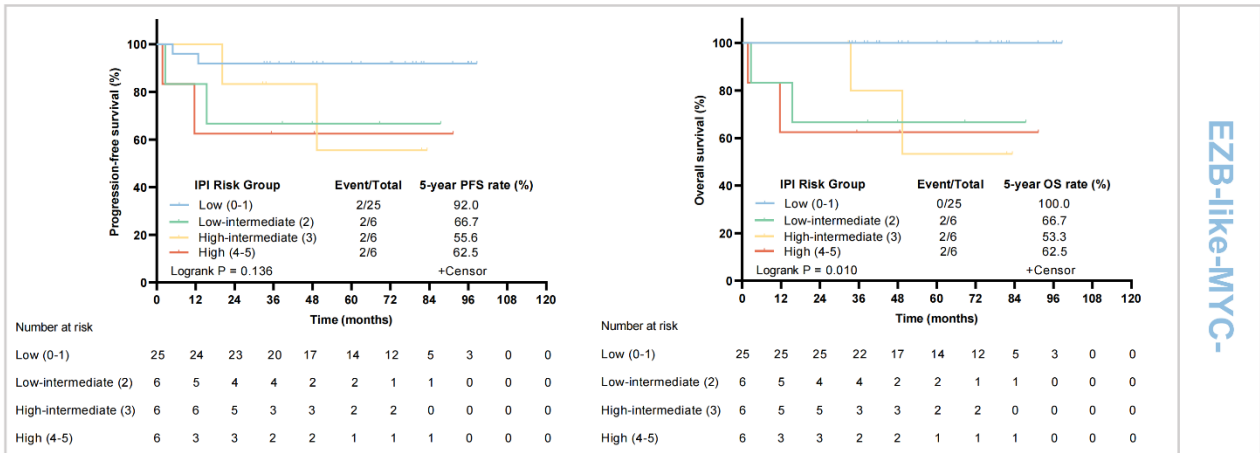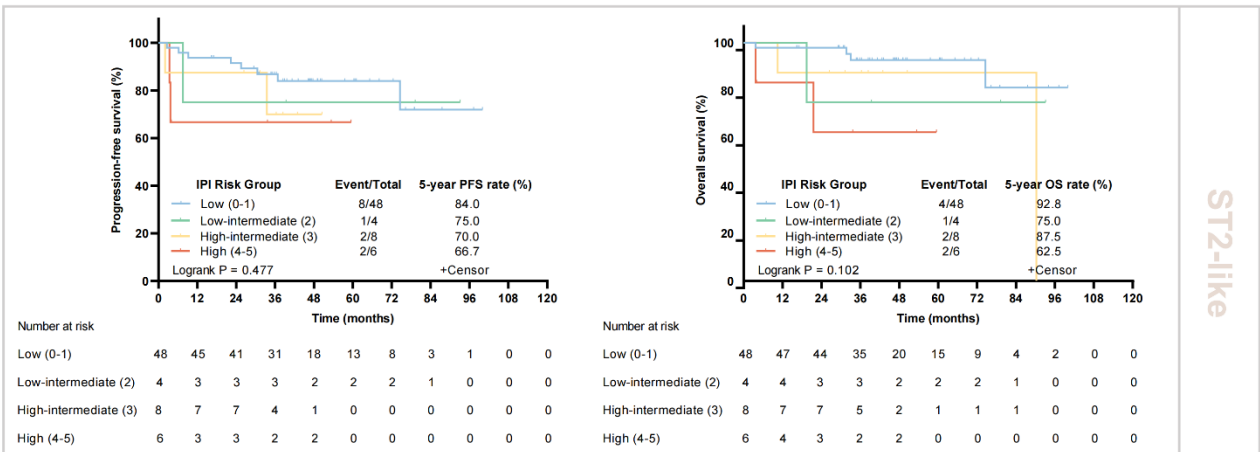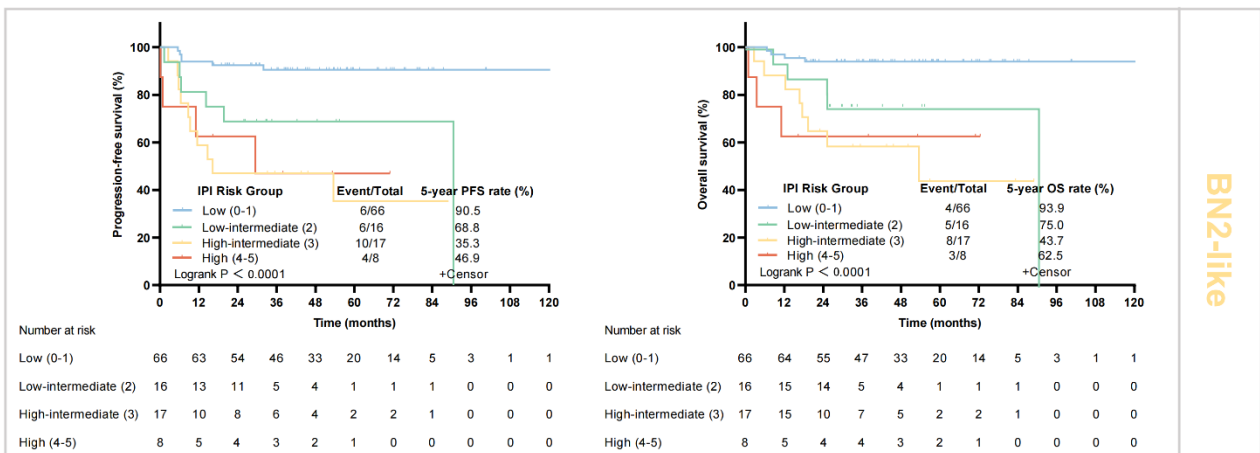



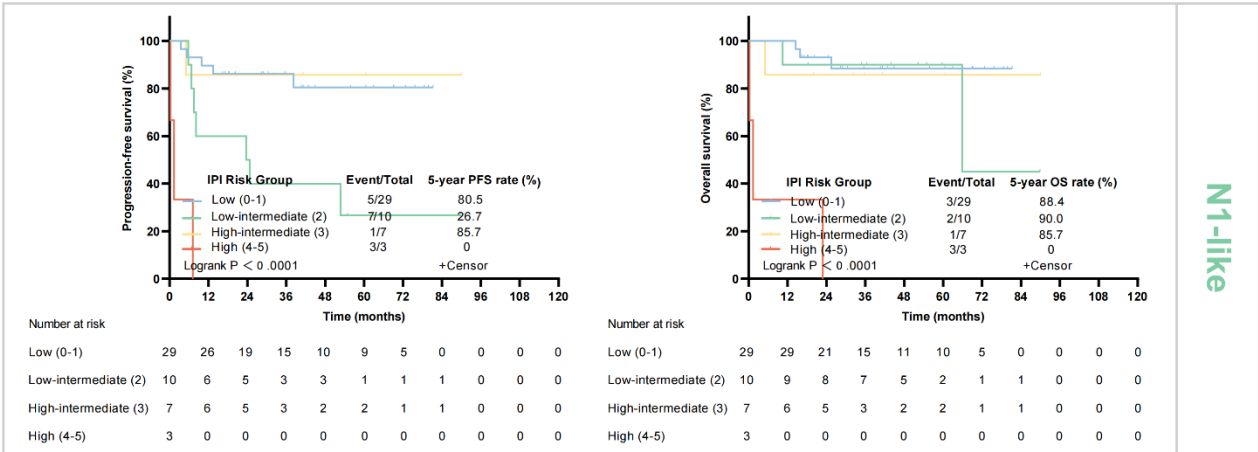

N1-like

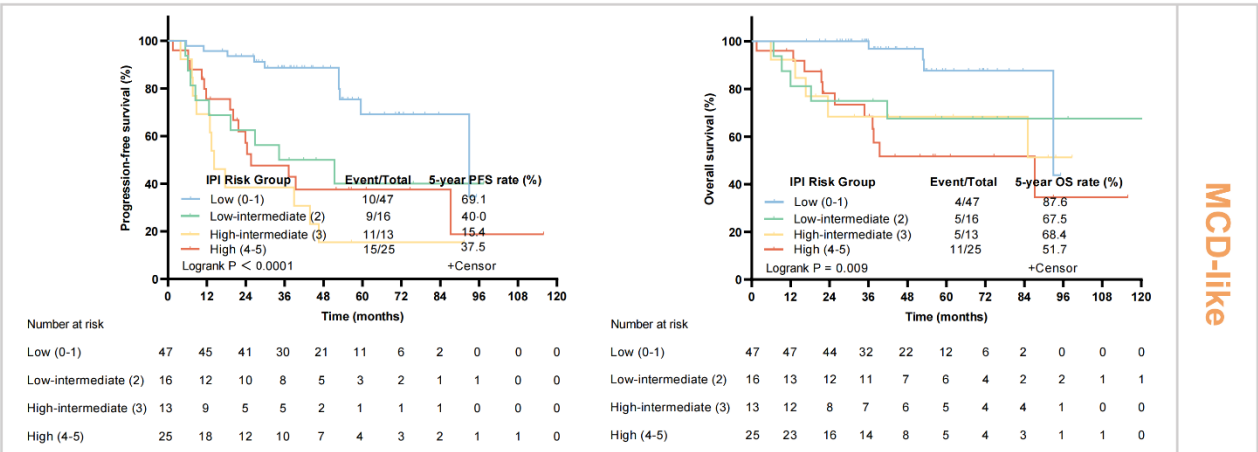

MCD-like

**Supplementary Table S4. Multivariable Cox PH Regression With Internal Validation Parameters**

(A) and Molecularly-enhanced IPI Model Definition (B) (n = 963).

| (A) Factors    | Hazard ratio<br>(95%CI) for PFS | z-Score | Ratio <sup>a</sup> | Weight | P        |
|----------------|---------------------------------|---------|--------------------|--------|----------|
| <i>TP53Mut</i> | 1.548 (1.173-2.044)             | 3.084   | 1.000              | 1      | 0.002    |
| <b>IPI</b>     |                                 |         |                    |        |          |
| IPI 0-1        | 1.000                           | -       | -                  |        |          |
| IPI 2          | 3.748 (2.734-5.137)             | 8.210   | 2.662              | 3      | < 0.0001 |
| IPI 3          | 4.615 (3.409-6.249)             | 9.893   | 3.208              | 3      | < 0.0001 |
| IPI 4-5        | 7.223 (5.277-9.885)             | 12.350  | 4.005              | 4      | < 0.0001 |

  

| (B) Molecularly-enhanced IPI | n (%)      | Hazard ratio<br>(95%CI) for PFS | P for PFS | Hazard ratio (95%CI)<br>for OS | P for OS |
|------------------------------|------------|---------------------------------|-----------|--------------------------------|----------|
| <b>Risk groups (score)</b>   |            |                                 |           |                                |          |
| Low (0-1)                    | 540 (56.1) | 1.000                           |           | 1.000                          |          |
| Low-intermediate (3)         | 252 (26.2) | 3.920 (2.967-5.178)             | < 0.0001  | 4.469 (3.080-6.484)            | < 0.0001 |
| High-intermediate (4)        | 154 (16.0) | 6.120 (4.552-8.228)             | < 0.0001  | 7.935 (5.416-11.625)           | < 0.0001 |
| High (5)                     | 17 (1.8)   | 14.796 (8.627-25.376)           | < 0.0001  | 19.980 (10.476-38.104)         | < 0.0001 |

The weights were obtained rounding the ratio. Score: sum of weights.

Abbreviations: HR, hazard ratio; IPI, International Prognostic Index; OS, overall survival; PH, proportional hazard.

<sup>a</sup>The z-score for any factor was divided by the minimum z-score observed (*TP53<sup>Mut</sup>*, considered as reference) to obtain the ratio.

**Supplementary Figure S3.** (A) Progression-free survival (PFS) by five levels of risk stratified by Molecularly-enhanced IPI in training cohort. (B) Overall survival (OS) by five levels of risk stratified by Molecularly-enhanced IPI in training cohort. (C) OS into four main risk groups stratified by Molecularly-enhanced IPI in training cohort. (D) OS for IPI risk groups in training cohort. (E) PFS into four main risk groups stratified by Molecularly-enhanced IPI in validation cohort. (F) OS into four main risk groups stratified by Molecularly-enhanced IPI in validation cohort. (G) PFS for IPI risk groups in validation cohort. (H) OS for IPI risk groups in validation cohort.

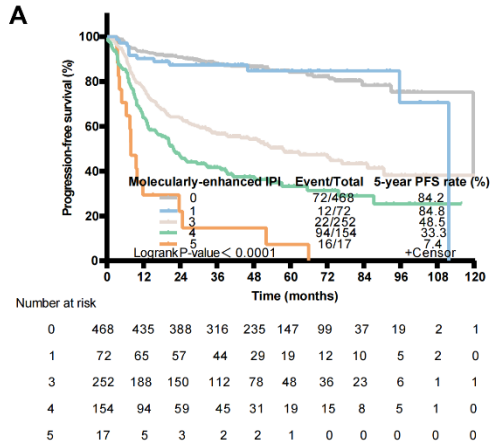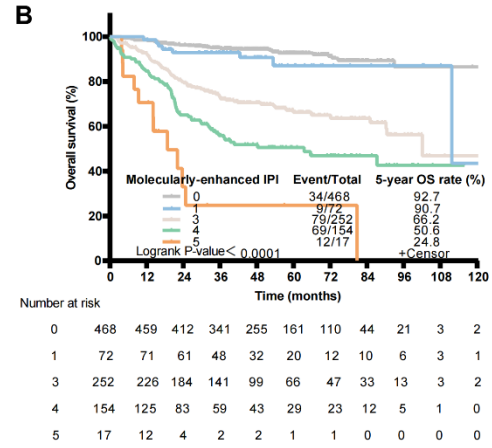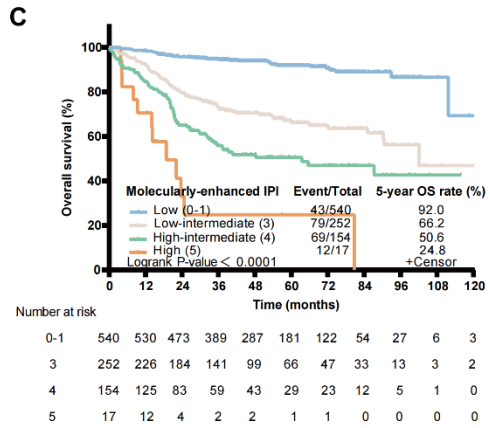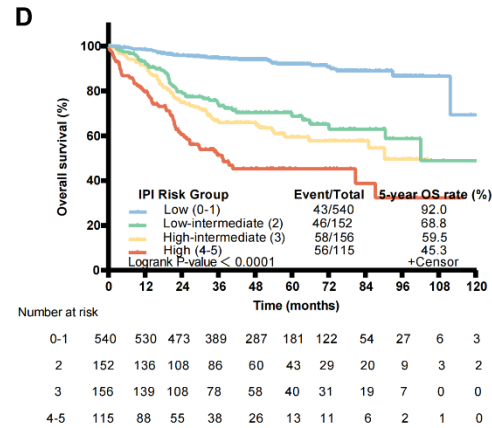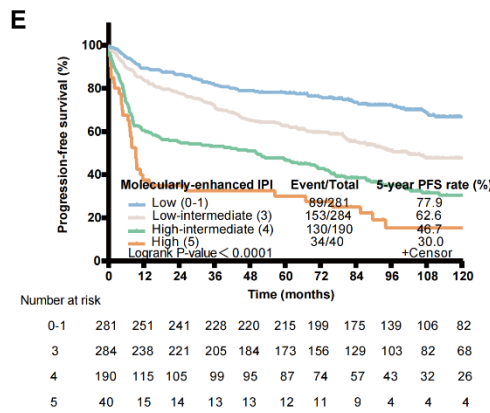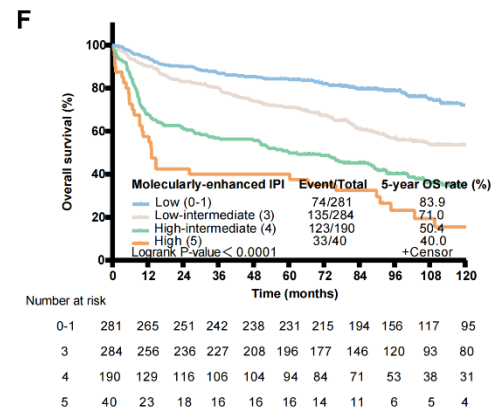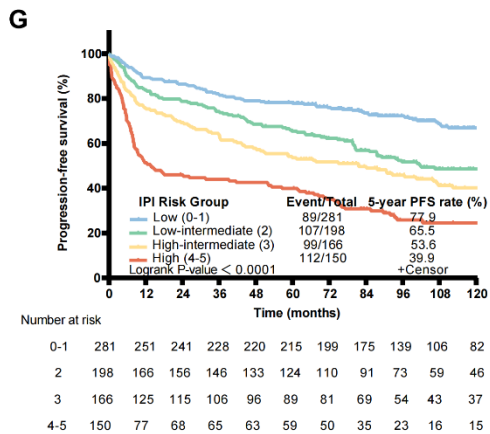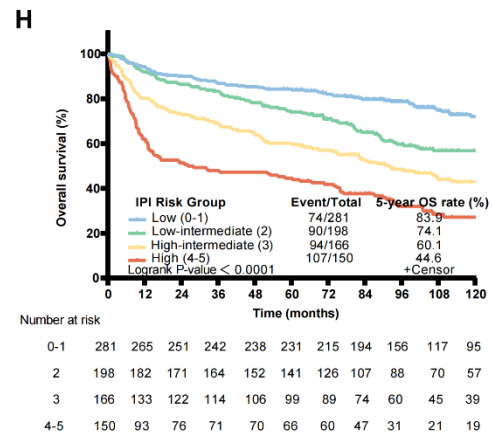

**Supplementary Table S5.** Stratified models for PFS and OS in training cohort (n = 963).

| Model                           | PFS                   |                     |          | OS                     |                     |          |
|---------------------------------|-----------------------|---------------------|----------|------------------------|---------------------|----------|
|                                 | Hazard ratio (95%CI)  | C-index             | AIC      | Hazard ratio (95%CI)   | C-index             | AIC      |
| <b>Molecularly-enhanced IPI</b> |                       |                     |          |                        |                     |          |
| Low (0-1)                       | 1.000                 |                     |          | 1.000                  |                     |          |
| Low-intermediate (3)            | 3.920 (2.967-5.178)   | 0.711 (0.684-0.739) | 3898.918 | 4.469 (3.080-6.484)    | 0.743 (0.711-0.775) | 2462.153 |
| High-intermediate (4)           | 6.120 (4.552-8.228)   |                     |          | 7.935 (5.416-11.625)   |                     |          |
| High (5)                        | 14.796 (8.627-25.376) |                     |          | 19.980 (10.476-38.104) |                     |          |
| <b>IPI</b>                      |                       |                     |          |                        |                     |          |
| Low (0-1)                       | 1.000                 |                     |          | 1.000                  |                     |          |
| Low-intermediate (2)            | 3.772 (2.752-5.171)   | 0.711 (0.683-0.739) | 3914.485 | 4.210 (2.771-6.395)    | 0.742 (0.709-0.775) | 2472.199 |
| High-intermediate (3)           | 4.717 (3.486-6.384)   |                     |          | 5.643 (3.801-8.378)    |                     |          |
| High (4-5)                      | 7.104 (5.193-9.719)   |                     |          | 9.631 (6.460-14.359)   |                     |          |

\*The AIC provided a relative measure of model quality; smaller values correspond with a better fitting model. Differences in AIC < 2 between models indicate no improvement in fit, differences > 2 but < 10 indicate increasing improvement in fit, and differences ≥ 10 indicate substantial improvement in the fit of the model.

†The C-index provided a measure of predictive ability of the model, defined as the probability of concordance between predicted and observed survival. The C-index corresponds to the area under the receiver operating characteristics curve for censored data. C-index values of 0.5, 0.7, and 1.0 indicate that the model has completely random, acceptable, or perfect discrimination, respectively, between short and long survival times.

**Supplementary Table S6.** Stratified models for PFS and OS in validation cohort (n = 795).

| Model                           | PFS                  |                     |          | OS                   |                     |          |
|---------------------------------|----------------------|---------------------|----------|----------------------|---------------------|----------|
|                                 | Hazard ratio (95%CI) | C-index             | AIC      | Hazard ratio (95%CI) | C-index             | AIC      |
| <b>Molecularly-enhanced IPI</b> |                      |                     |          |                      |                     |          |
| Low (0-1)                       | 1.000                |                     |          | 1.000                |                     |          |
| Low-intermediate (3)            | 1.934 (1.489-2.512)  | 0.643 (0.616-0.670) | 4955.806 | 2.026 (1.526-2.691)  | 0.655 (0.627-0.683) | 4442.604 |
| High-intermediate (4)           | 3.294 (2.514-4.315)  |                     |          | 3.670 (2.748-4.901)  |                     |          |
| High (5)                        | 5.465 (3.673-8.131)  |                     |          | 6.076 (4.024-9.175)  |                     |          |
| <b>IPI</b>                      |                      |                     |          |                      |                     |          |
| Low (0-1)                       | 1.000                |                     |          | 1.000                |                     |          |
| Low-intermediate (2)            | 1.921 (1.450-2.545)  | 0.644 (0.617-0.671) | 4962.667 | 1.884 (1.385-2.563)  | 0.661 (0.633-0.690) | 4443.204 |
| High-intermediate (3)           | 2.343 (1.759-3.121)  |                     |          | 2.710 (1.998-3.676)  |                     |          |
| High (4-5)                      | 4.128 (3.119-5.463)  |                     |          | 4.628 (3.436-6.235)  |                     |          |

**Supplementary Figure S4.** Survival analysis of patients with available LME categories (n = 487).

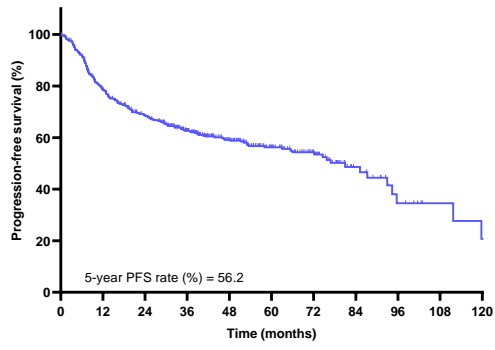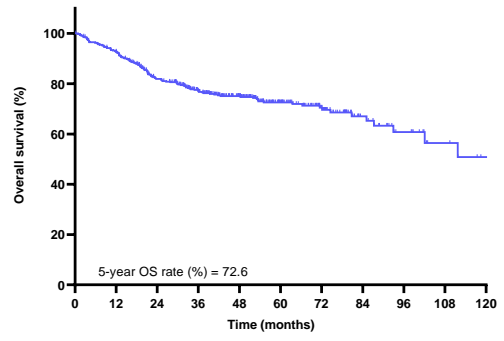

**Supplementary Table S7.** Stratified models for progression-free survival and overall survival of individual IPI risk factors and LME categories (N = 487).

| Risk factor            | PFS                 |         |                       |         | OS                  |         |                       |         |
|------------------------|---------------------|---------|-----------------------|---------|---------------------|---------|-----------------------|---------|
|                        | Univariate analysis |         | Multivariate analysis |         | Univariate analysis |         | Multivariate analysis |         |
|                        | Hazard ratio        | P       | Hazard ratio          | P       | Hazard ratio        | P       | Hazard ratio          | P       |
|                        | (95%CI)             |         | (95%CI)               |         | (95%CI)             |         | (95%CI)               |         |
| Age >60                | 1.543 (1.177-2.024) | 0.002   | 1.241 (0.940-1.638)   | 0.128   | 2.256 (1.589-3.203) | <0.0001 | 2.001 (1.399-2.862)   | <0.0001 |
| Ann Arbor stage III-IV | 3.218 (2.391-4.332) | <0.0001 | 2.299 (1.614-3.276)   | <0.0001 | 3.326 (2.265-4.883) | <0.0001 | 1.979 (1.264-3.099)   | 0.003   |
| Multiple ENI           | 2.169 (1.643-2.862) | <0.0001 | 1.004 (0.729-1.385)   | 0.979   | 2.199 (1.552-3.116) | <0.0001 | 1.063 (0.719-1.572)   | 0.760   |
| LDH ratio > 1*ULN      | 2.940 (2.178-3.970) | <0.0001 | 1.992 (1.435-2.766)   | <0.0001 | 3.653 (2.439-5.471) | <0.0001 | 2.461 (1.580-3.834)   | <0.0001 |
| ECOG >1                | 3.003 (2.092-4.312) | <0.0001 | 1.996 (1.374-2.899)   | <0.0001 | 3.062 (1.988-4.717) | <0.0001 | 2.070 (1.329-3.223)   | 0.001   |
| GC-LME                 | 0.956 (0.652-1.400) | 0.816   | -                     | -       | 0.838 (0.503-1.396) | 0.497   | -                     | -       |
| MS-LME                 | 0.625 (0.460-0.849) | 0.003   | 0.616 (0.452-0.840)   | 0.002   | 0.644 (0.438-0.947) | 0.025   | 0.641 (0.434-0.948)   | 0.026   |
| IN-LME                 | 1.299 (0.961-1.756) | 0.089   | -                     | -       | 1.258 (0.861-1.840) | 0.236   | -                     | -       |
| DP-LME                 | 1.330 (0.993-1.783) | 0.056   | -                     | -       | 1.409 (0.981-2.023) | 0.063   | -                     | -       |



**Supplementary Figure S5.** Survival analysis of IPI risk groups under different LME categories.

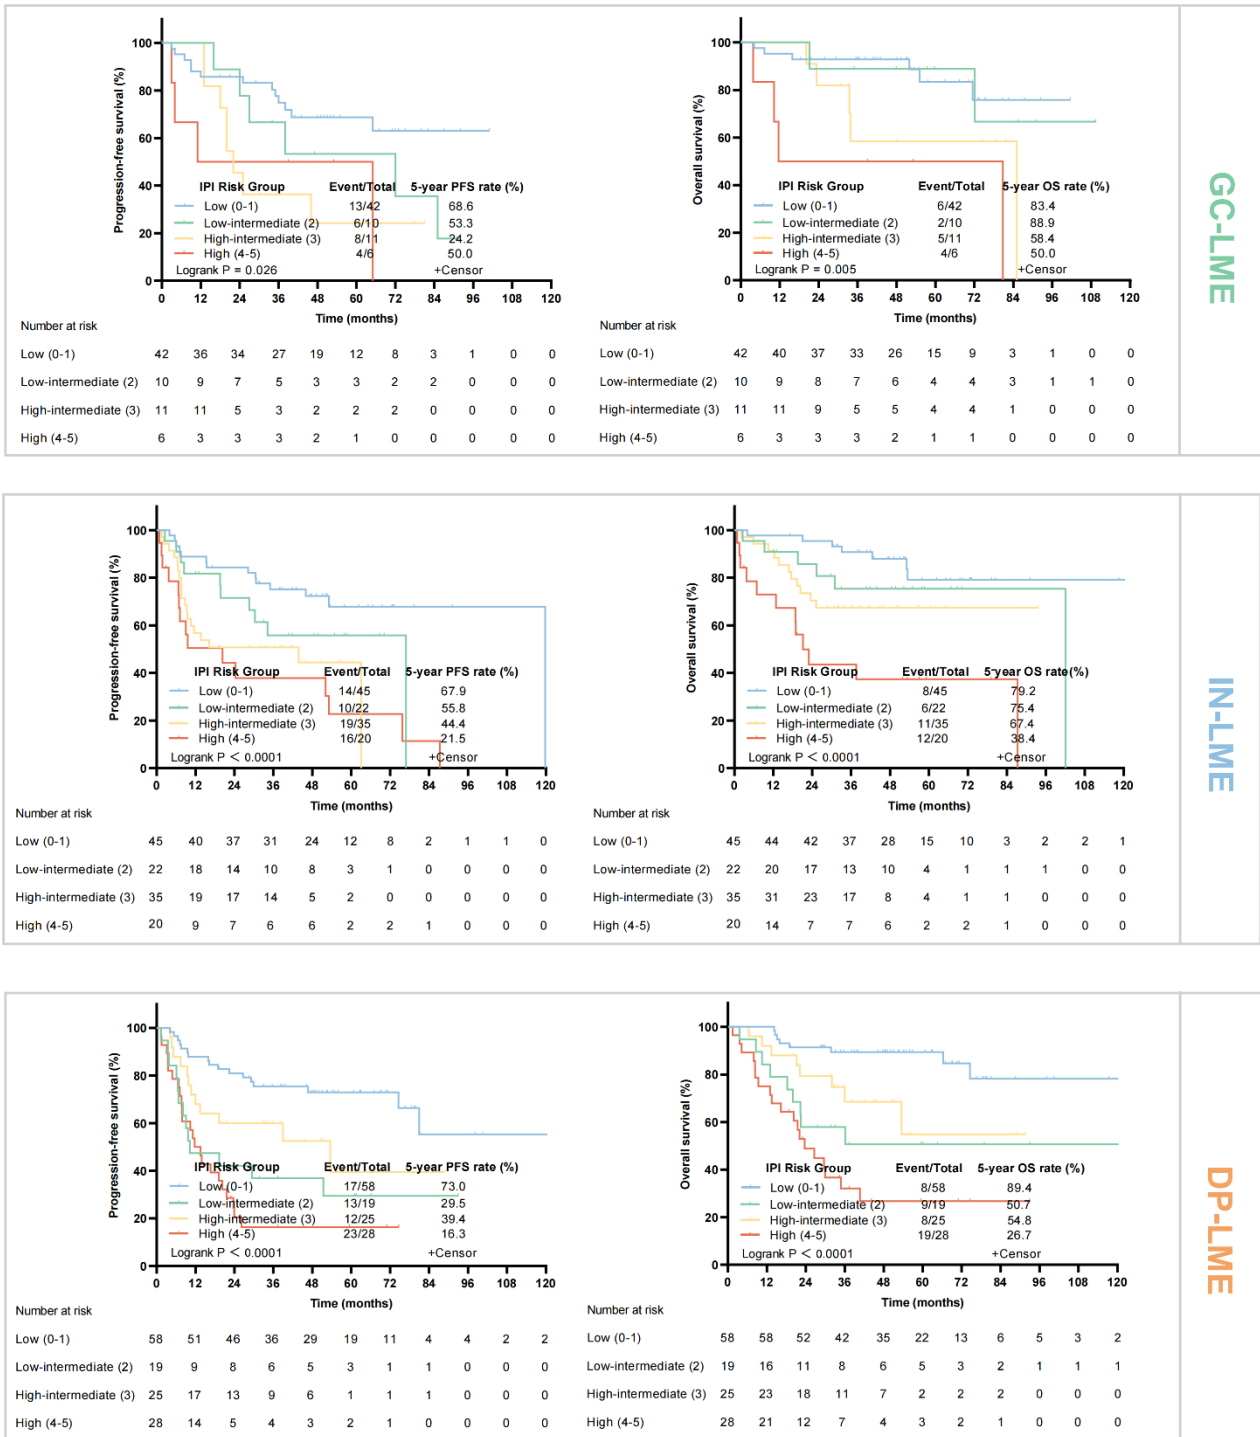

Supplement: BLOODA_ADV-2023-011425-mmc2.pdf [file BLOODA_ADV-2023-011425-mmc2.pdf]
